# Supplementary material
Source: HighWire-hosted journal article supplement (https://bmjopen.bmj.com/content/13/9/e075598)
Supplement: inline-supplementary-material-2 [file inline-supplementary-material-2.pdf]

## Eligible Medical Schools and Approved Programmes

A combination of the universities of Dundee and St. Andrews (ScotGEM)  
A combination of the University of Brighton and the University of Sussex  
A combination of the University of Hull and the University of York  
Anglia Ruskin School of Medicine  
Aston Medical School  
Brunel University London Medical School  
Cardiff University  
Edge Hill University Medical School  
Imperial College London  
Keele University  
Kent and Medway Medical School  
King's College London  
Lancaster University  
Queen Mary University of London  
St George's University of London  
Swansea University  
The Queen's University of Belfast  
The University of Aberdeen  
The University of Birmingham  
The University of Bristol  
The University of Buckingham  
The University of Cambridge  
The University of Central Lancashire  
The University of Dundee  
The University of Dundee  
The University of East Anglia  
The University of Edinburgh  
The University of Exeter  
The University of Glasgow  
The University of Leeds  
The University of Leicester  
The University of Liverpool  
The University of Manchester  
The University of Newcastle  
The University of Nottingham  
The University of Oxford  
The University of Plymouth  
The University of Sheffield  
The University of Southampton  
The University of St Andrew's  
The University of Warwick  
Ulster University School of Medicine  
University College London  
University of Sunderland School of Medicine

Excluded for lack of cohort at time of recruitment:

- University of Chester Medical School
- Three Counties Medical School
