# Supplementary material
Source: HighWire-hosted journal article supplement (https://bmjopen.bmj.com/content/13/9/e075598)

## Total responses by medical school

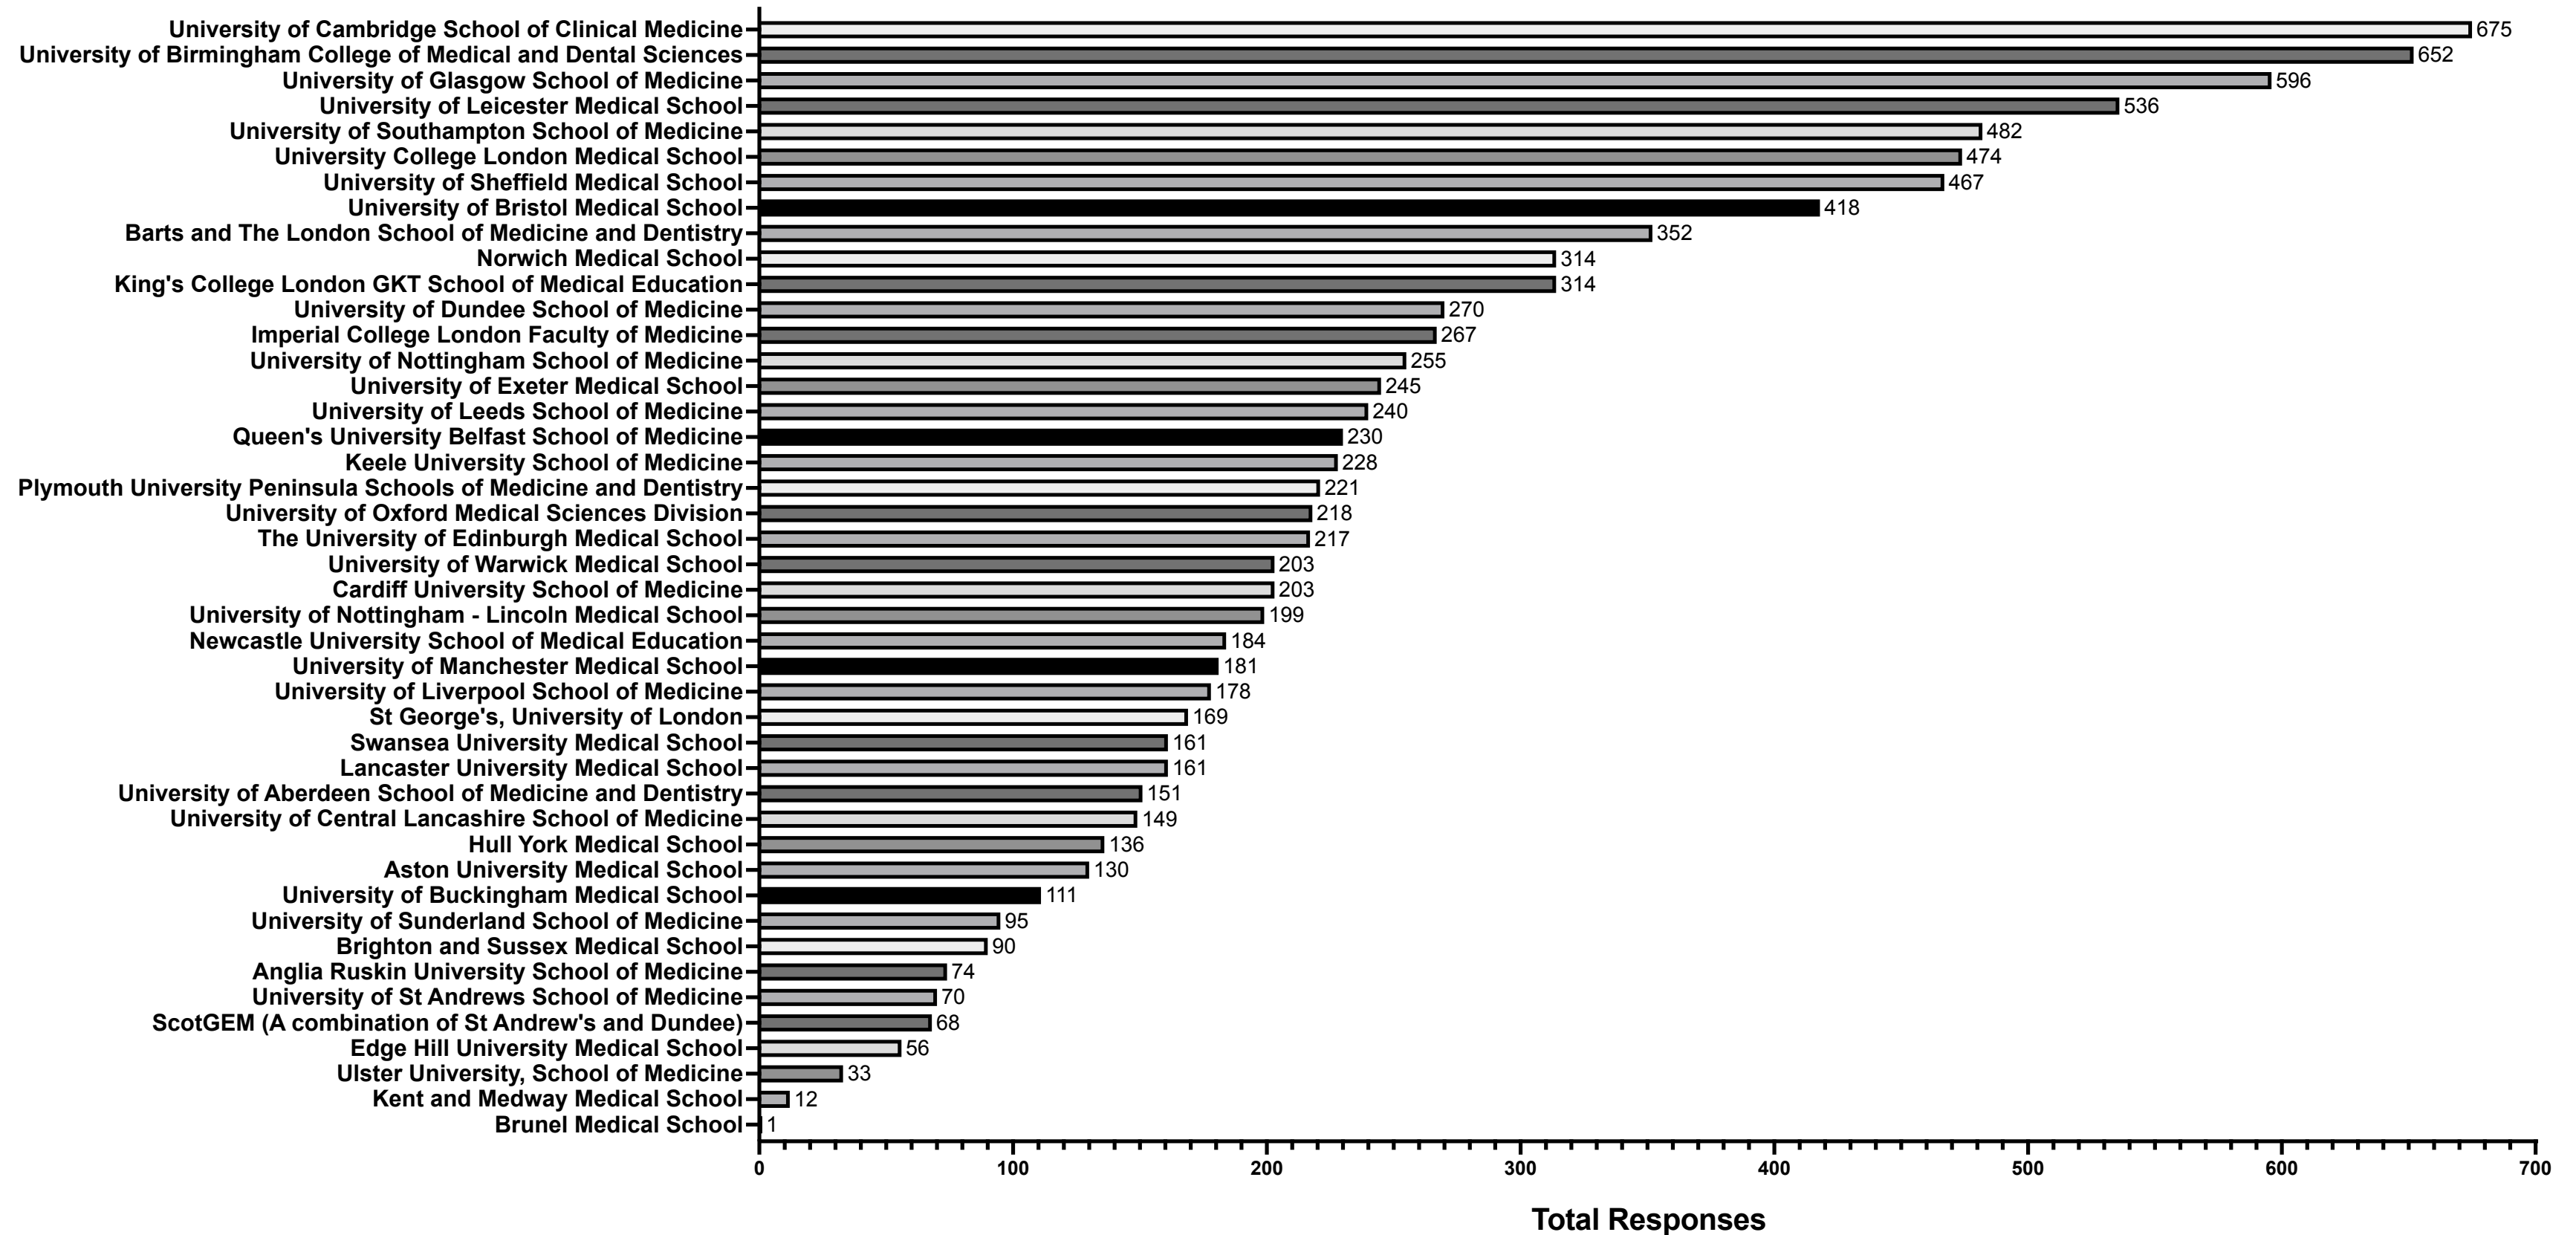

Supplement: inline-supplementary-material-4 [file inline-supplementary-material-4.pdf]
