# Supplementary material
Source: HighWire-hosted journal article supplement (https://bmjopen.bmj.com/content/13/9/e075598)
Supplement: inline-supplementary-material-5 [file inline-supplementary-material-5.pdf]

| Students' intention after graduation           | Number (%)    | Confidence Interval |
|------------------------------------------------|---------------|---------------------|
| Complete both FY1 and FY2                      | 8,806 (83.98) | [83.26, 84.67]      |
| Complete FY1 and emigrate to practice medicine | 1,101 (10.50) | [9.93,11.10]        |
| Complete FY1 and leave medicine permanently    | 132 (1.26)    | [1.06, 1.49]        |
| Leave medicine permanently                     | 104 (0.99)    | [0.82, 1.20]        |
| Emigrate to practice medicine                  | 220 (2.10)    | [1.84, 2.39]        |
| Take a break or undertake further study        | 123 (1.17)    | [0.98, 1.40]        |
