# Supplementary material
Source: HighWire-hosted journal article supplement (https://bmjopen.bmj.com/content/13/9/e075598)
Supplement: inline-supplementary-material-6 [file inline-supplementary-material-6.pdf]

| Students' intention after the Foundation Programme           | Number (%)    | Confidence Interval |
|--------------------------------------------------------------|---------------|---------------------|
| Enter specialty training in the UK                           | 4,294 (48.76) | [47.72, 49.81]      |
| Assume a non-training clinical job in the UK                 | 1,859 (21.11) | [20.27, 21.98]      |
| Emigrate to practice medicine abroad (including temporarily) | 2,071 (23.52) | [22.64, 24.42]      |
| Take a break or undertake further study                      | 515 (5.85)    | [5.38, 6.36]        |
| Leave medicine permanently                                   | 67 (0.76)     | [0.60, 0.97]        |
