# Supplementary material
Source: HighWire-hosted journal article supplement (https://bmjopen.bmj.com/content/13/9/e075598)
Supplement: inline-supplementary-material-10 [file inline-supplementary-material-10.pdf]

| Demographic subgroup                       | Return prospects  |                           |                 |
|--------------------------------------------|-------------------|---------------------------|-----------------|
|                                            | After a few years | After completing training | Will not return |
| <i>Ethnicity</i>                           |                   |                           |                 |
| White                                      | 1,133 (58.46)     | 131 (6.76)                | 674 (34.78)     |
| Asian or Asian British                     | 334 (36.66)       | 78 (8.56)                 | 499 (54.77)     |
| Black, Black British, Caribbean or African | 79 (44.89)        | 15 (8.52)                 | 82 (46.59)      |
| Mixed or multiple ethnic groups            | 88 (46.07)        | 23 (12.04)                | 80 (41.88)      |
| Other                                      | 40 (28.37)        | 18 (12.77)                | 83 (58.87)      |
| Prefer not to say                          | 7 (20.00)         | 2 (5.71)                  | 26 (74.29)      |
| <i>Gender</i>                              |                   |                           |                 |
| Female                                     | 1,165 (53.37)     | 175 (8.02)                | 843 (38.62)     |
| Male                                       | 512 (42.99)       | 92 (7.72)                 | 587 (49.29)     |
| Non-binary                                 | 3 (25.00)         | 0 (0)                     | 9 (75.00)       |
| Prefer not to say                          | 1 (16.67)         | 0 (0)                     | 5 (83.33)       |
| <i>Level of education</i>                  |                   |                           |                 |
| Postgraduate                               | 311 (46.49)       | 51 (7.62)                 | 307 (45.89)     |
| Undergraduate                              | 1,370 (50.31)     | 216 (7.93)                | 1137 (41.76)    |
| <i>Previous schooling</i>                  |                   |                           |                 |
| Private education                          | 578 (44.91)       | 113 (8.78)                | 596 (46.31)     |
| State education                            | 1,072 (52.96)     | 143 (7.07)                | 809 (39.97)     |

|                               |               |            |              |
|-------------------------------|---------------|------------|--------------|
| Prefer not to say             | 31 (38.27)    | 11 (13.58) | 39 (48.15)   |
| <hr/>                         |               |            |              |
| <i>Fee status</i>             |               |            |              |
| Home                          | 1,572 (56.67) | 221 (7.97) | 981 (35.36)  |
| EU                            | 45 (20.74)    | 17 (7.83)  | 155 (71.43)  |
| International (Non-EU)        | 64 (15.96)    | 29 (7.23)  | 308 (76.81)  |
| <hr/>                         |               |            |              |
| <i>Current year of study</i>  |               |            |              |
| Year 1                        | 297 (46.05)   | 65 (10.08) | 283 (43.88)  |
| Year 2                        | 346 (48.53)   | 55 (7.71)  | 312 (43.76)  |
| Year 3                        | 281 (47.15)   | 55 (9.23)  | 260 (43.62)  |
| Year 4 (not penultimate year) | 163 (50.00)   | 25 (7.67)  | 138 (42.33)  |
| Penultimate year              | 313 (50.81)   | 47 (7.63)  | 256 (41.56)  |
| Final year                    | 281 (56.65)   | 20 (4.03)  | 195 (39.31)  |
| <hr/>                         |               |            |              |
| <i>Total</i>                  | 1681 (49.56)  | 267 (7.87) | 1444 (42.57) |
| <hr/>                         |               |            |              |
