# Supplementary material
Source: HighWire-hosted journal article supplement (https://bmjopen.bmj.com/content/13/9/e075598)
Supplement: inline-supplementary-material-12 [file inline-supplementary-material-12.pdf]

| Students' intention after graduation           | Year 1       | Year 2       | Year 3       | Year 4 (not penultimate year) | Penultimate Year | Final Year   |
|------------------------------------------------|--------------|--------------|--------------|-------------------------------|------------------|--------------|
| Complete both FY1 and FY2                      | 1616 (82.32) | 1723 (80.07) | 1643 (84.17) | 759 (80.15)                   | 1728 (86.88)     | 1337 (90.16) |
| Complete FY1 and emigrate to practice medicine | 251 (12.79)  | 283 (13.15)  | 208 (10.66)  | 114 (12.04)                   | 161 (8.09)       | 84 (5.66)    |
| Complete FY1 and leave medicine permanently    | 8 (0.41)     | 15 (0.70)    | 24 (1.23)    | 18 (1.90)                     | 37 (1.86)        | 30 (2.02)    |
| Leave medicine permanently                     | 10 (0.51)    | 23 (1.07)    | 17 (0.87)    | 20 (2.11)                     | 23 (1.16)        | 11 (0.74)    |
| Emigrate to practice medicine                  | 61 (3.11)    | 65 (3.02)    | 45 (2.31)    | 19 (2.01)                     | 20 (1.01)        | 10 (0.67)    |
| Take a break or undertake further study        | 17 (0.87)    | 43 (2.00)    | 15 (0.77)    | 17 (1.80)                     | 20 (1.01)        | 11 (0.74)    |
