# Supplementary material
Source: HighWire-hosted journal article supplement (https://bmjopen.bmj.com/content/13/9/e075598)
Supplement: inline-supplementary-material-13 [file inline-supplementary-material-13.pdf]

| Students' intention after the Foundation Programme           | Year 1       | Year 2       | Year 3      | Year 4 (not penultimate year) | Penultimate Year | Final Year  |
|--------------------------------------------------------------|--------------|--------------|-------------|-------------------------------|------------------|-------------|
| Enter specialty training in the UK                           | 1093 (67.64) | 1071 (62.16) | 866 (52.71) | 298 (39.26)                   | 621 (35.94)      | 345 (25.80) |
| Assume a non-training clinical job in the UK                 | 109 (6.75)   | 197 (11.43)  | 326 (19.84) | 192 (25.30)                   | 554 (32.06)      | 481 (35.98) |
| Emigrate to practice medicine abroad (including temporarily) | 333 (20.61)  | 365 (21.18)  | 343 (20.88) | 193 (25.43)                   | 435 (25.17)      | 402 (30.07) |
| Take a break or undertake further study                      | 78 (4.83)    | 86 (4.99)    | 96 (5.84)   | 68 (8.96)                     | 103 (5.96)       | 84 (6.28)   |
| Leave medicine permanently                                   | 3 (0.19)     | 4 (0.23)     | 12 (0.73)   | 8 (1.05)                      | 15 (0.87)        | 25 (1.87)   |
